# Supplementary material
Source: PubMed Central journal article supplement (PMC5586585)
Supplement: CJN.12991216SupplementaryData.pdf [file CJN.12991216SupplementaryData.pdf]

## **Appendix 1**

**Study authors:** Soren Snitker, MD, PhD, Rebecca M Doerfler, MPH, Elsayed Z. Soliman MD, MSc, MS, Rajat Deo, MD, MTR, Wendy L St. Peter, PharmD, Susan Kramlik, MS  
Michael J Fischer, MD, MSPH, Sankar Navaneethan, MD, MS, MPH  
Patrice Delafontaine, MD, Bernard G Jaar, MD, MPH, Akinlolu Ojo, MD, PhD  
Gail K Makos, MSN, MP-C, Anne Slaven, MSSA, Matthew R Weir, MD  
Min Zhan, PhD, Jeffrey C Fink, MD, MS

**CRIC Study Investigators:** Lawrence J. Appel, MD MPH, Harold I. Feldman, MD MSCE, Alan S. Go MD, Jiang He MD PhD, John W. Kusek, PhD, Mahboob Rahman MD, Raymond R. Townsend MD

**SS, RMD, MRW, JCF;** Department of Medicine, School of Medicine, University of Maryland, Baltimore, MD

**EZS;** Epidemiological Cardiology Research Center (EPICARE), Wake Forest School of Medicine, Winston Salem, NC

**RD, RRT;** Department of Medicine, Perelman School of Medicine, University of Pennsylvania, Philadelphia, PA

**WLSP;** Department of Pharmaceutical Care and Health Systems, College of Pharmacy, University of Minnesota, Minneapolis, MN

**SK, HIF;** Center for Clinical Epidemiology & Biostatistics, Perelman School of Medicine, University of Pennsylvania, Philadelphia, PA

**MJF;** Department of Medicine, University of Illinois at Chicago, Chicago, IL

**SN;** Department of Medicine, Baylor College of Medicine, Houston, TX

**PD;** Department of Medicine and Department of Medical Pharmacology and Physiology, School of Medicine, University of Missouri, Columbia, MO

**BGJ, LJA;** Department of Medicine and Department of Epidemiology, Welch Center for Prevention, Epidemiology and Clinical Research, The Johns Hopkins University, Baltimore, MD

**AO;** Department of Medicine-Nephrology, University of Arizona, Tucson, AZ

**GKM;** St. Clair Nephrology, Roseville, MI

**AS;** Department of Medicine, Metro Health Medical Center, Cleveland, OH

**MZ;** Department of Epidemiology and Public Health, University of Maryland School of Medicine, Baltimore, MD

**ASG;** Division of Research, Kaiser Permanente of Northern California, Oakland, CA

**JH;** Department of Epidemiology, School of Public Health and Tropical Medicine, Tulane University, New Orleans, LA

**JWK;** National Institute of Diabetes, and Digestive, and Kidney Diseases, National Institutes of Health, Bethesda, MD

**MR;** Department of Medicine, Case Western Reserve University School of Medicine, Cleveland, OH

**PR;** Department of Epidemiology and Public Health, School of Medicine, University of Maryland, Baltimore, MD
